# Supplementary material for: Toxic Potential and Metabolic Profiling of Two Australian Biotypes of the Invasive Plant Parthenium Weed (Parthenium hysterophorus L.)
Source: MDPI journal article supplement (doi:10.3390/toxins12070447), 2020-07-10
Supplement: s1 [file s1]

# Supplementary Materials: Toxic Potential and Metabolic Profiling of Two Australian Biotypes of the Invasive Plant Parthenium Weed (*Parthenium hysterophorus* L.)

Ali Ahsan Bajwa, Paul A. Weston, Saliya Gurusinghe, Sajid Latif, Steve W. Adkins and Leslie A. Weston

**Table S1.** Analysis of the variance for the effect of shoot and root extracts of parthenium weed biotypes on the germination, radicle elongation and the hypocotyl elongation inhibition of garden cress seeds.

| Source of Variation | Degree of Freedom | P-Values       |       |       |               |       |       |
|---------------------|-------------------|----------------|-------|-------|---------------|-------|-------|
|                     |                   | Shoot Extracts |       |       | Root Extracts |       |       |
|                     |                   | GI             | RI    | HI    | GI            | RI    | HI    |
| Biotype (B)         | 1                 | 0.823          | 0.548 | 0.239 | 0.354         | 0.793 | 0.959 |
| Concentration (C)   | 4                 | 0.964          | 0.899 | 0.738 | 0.473         | 0.311 | 0.559 |
| B × C               | 4                 | 0.692          | 0.936 | 0.974 | 0.436         | 0.727 | 0.380 |

GI = germination inhibition, RI = radicle inhibition, HI = hypocotyl inhibition. The *p* values < 0.05 are significant.

**Table S2.** Analysis of the variance for the effect of the leaf extracts of parthenium weed biotypes on the germination, radicle elongation and the hypocotyl elongation inhibition of garden cress and annual ryegrass seeds.

| Source of Variation | Degree of Freedom | P-Values     |        |        |                 |        |        |
|---------------------|-------------------|--------------|--------|--------|-----------------|--------|--------|
|                     |                   | Garden Cress |        |        | Annual Ryegrass |        |        |
|                     |                   | GI           | RI     | HI     | GI              | RI     | HI     |
| Biotype (B)         | 1                 | 0.002        | 0.089  | 0.010  | 0.151           | 0.343  | 0.428  |
| Concentration (C)   | 4                 | <0.001       | <0.001 | <0.001 | <0.001          | <0.001 | <0.001 |
| B × C               | 4                 | 0.466        | 0.556  | 0.185  | 0.953           | 0.873  | 0.954  |

GI = germination inhibition, RI = radicle inhibition, HI = hypocotyl inhibition. The *p* values < 0.05 are significant.

**Table S3.** Analysis of the variance for the effect of the leaf, shoot and root extracts of the parthenium weed biotypes on the inhibition of NIH3T3 murine fibroblasts in the absence (cytotoxicity) or presence of UV-A radiation (photocytotoxicity). The *p* values < 0.05 are significant.

| Source of Variation | Degree of Freedom | P-Values         |               |
|---------------------|-------------------|------------------|---------------|
|                     |                   | No UV-A Exposure | UV-A Exposure |
| Tissue (T)          | 2                 | <0.001           | <0.001        |
| Biotype (B)         | 1                 | <0.001           | 0.644         |
| Concentration (C)   | 3                 | <0.001           | <0.001        |
| T × B               | 2                 | 0.125            | 0.259         |
| T × C               | 6                 | 0.002            | 0.115         |
| B × C               | 3                 | 0.942            | 0.855         |
| T × B × C           | 6                 | 0.711            | 0.948         |

**Table S4.** Analysis of the variance for the effect of the extended concentrations of leaf extracts (second experiment) of the parthenium weed biotypes on the inhibition of NIH3T3 murine fibroblasts in the absence (cytotoxicity) or presence of UV-A radiation (photocytotoxicity). The *p* values < 0.05 are significant.

| Source of Variation | Degree of Freedom | P-Values         |               |
|---------------------|-------------------|------------------|---------------|
|                     |                   | No UV-A Exposure | UV-A Exposure |
| Biotype (B)         | 1                 | 0.858            | 0.107         |
| Concentration (C)   | 5                 | <0.001           | <0.001        |
| B × C               | 5                 | 0.741            | 0.795         |

**Table S5.** Analysis of the variance for the parthenin quantities and the relative abundance of other major compounds in the leaf, shoot or the root extracts of the two parthenium weed biotypes detected in this study. The *p* values < 0.05 are significant. Relative abundance data were subjected to square-root transformation ( $\sqrt{(x + 0.5)}$ ) before analysis. The *p* values < 0.05 are significant.

| Source of Variation | Degree of Freedom | P-Values  |             |                    |        |                  |
|---------------------|-------------------|-----------|-------------|--------------------|--------|------------------|
|                     |                   | Quantity  |             | Relative Abundance |        |                  |
|                     |                   | Parthenin | Coronopilin | Ambrosin           | Damsin | Chlorogenic acid |
| Tissue (T)          | 2                 | <0.001    | <0.001      | <0.001             | <0.001 | 0.575            |
| Biotype (B)         | 1                 | 0.382     | 0.197       | 0.133              | 0.231  | 0.297            |
| T × B               | 2                 | 0.282     | 0.485       | 0.046              | 0.609  | 0.445            |
